# Supplementary material for: Prenylated phenolic compounds from licorice (Glycyrrhiza uralensis) and their anti-inflammatory activity against osteoarthritis
Source: Royal Society of Chemistry journal article supplement (doi:10.1039/d1fo03659a), 2021-12-10
Supplement: d1fo03659a1.pdf [file d1fo03659a1.pdf]

## Supporting Information

### **Prenylated phenolic compounds from licorice (*Glycyrrhiza uralensis*) and their anti-inflammatory activity against osteoarthritis**

Lu Zhao <sup>1</sup>, Xiaofei Chen <sup>1</sup>, Xian Shao, Ziyu Wang, Yan Du, Cuicui Zhu, Wei Du,  
Daoquan Tang <sup>\*</sup>, Shuai Ji <sup>\*</sup>

*Jiangsu Key Laboratory of New Drug Research and Clinical Pharmacy, School of  
Pharmacy, Xuzhou Medical University, Xuzhou 221004, China*

<sup>1</sup> The authors (L. Zhao and X. Chen) contributed equally to this work.

<sup>\*</sup> Corresponding authors. Tel.: +86 516 83263133. Fax: +86 516 83263133. Email  
address: jishuai0115@163.com (S. Ji) or tangdq@xzhmu.edu.cn (D. Tang).

## List of Contents

**Table S1** Extracted heats and weighting factors of the optimized conformers for compound **2**.

**Table S2.** The sequences of the oligonucleotide primers used in this experiment.

**Fig. S1** Optimized geometries of predominant conformers for compound **2**.

**Fig. S2** Identification of mouse primary chondrocytes by Alcian blue staining (A) and type II collagen immunohistochemistry (B).

**Fig. S3** (A) Cytotoxic effect of (3*R*)-**2** and (3*S*)-**2** at 10  $\mu$ M: Primary mouse chondrocytes were treated with (3*R*)-**2** or (3*S*)-**2** for 36 h, and cell viability was evaluated using the MTT reagent. (B) NO inhibition effect of (3*R*)-**2** and (3*S*)-**2** at 10  $\mu$ M: Chondrocytes were treated with (3*R*)-**2** or (3*S*)-**2** for 36 h after IL-1 $\beta$  stimulation, and NO level in culture medium was determined using Griess assay.

**Fig. S4**  $^1\text{H}$  NMR spectrum of glycyuralin Q (**1**) in DMSO- $d_6$  (400 MHz).

**Fig. S5**  $^{13}\text{C}$  NMR spectrum of glycyuralin Q (**1**) in DMSO- $d_6$  (100 MHz).

**Fig. S6** HMBC spectrum of glycyuralin Q (**1**) in DMSO- $d_6$  (400 MHz).

**Fig. S7** HSQC spectrum of glycyuralin Q (**1**) in DMSO- $d_6$  (400 MHz).

**Fig. S8** NOESY spectrum of glycyuralin Q (**1**) in DMSO- $d_6$  (400 MHz).

**Fig. S9** IR spectrum of glycyuralin Q (**1**).

**Fig. S10** UV spectrum of glycyuralin Q (**1**).

**Fig. S11** HR-ESI-MS spectrum of glycyuralin Q (**1**).

**Fig. S12**  $^1\text{H}$  NMR spectrum of glycyuralin R (**2**) in DMSO- $d_6$  (400 MHz).

**Fig. S13**  $^{13}\text{C}$  NMR spectrum of glycyuralin R (**2**) in DMSO- $d_6$  (100 MHz).

**Fig. S14** HMBC spectrum of glycyuralin R (**2**) in DMSO- $d_6$  (400 MHz).

**Fig. S15** HSQC spectrum of glycyuralin R (**2**) in DMSO- $d_6$  (400 MHz).

**Fig. S16** NOESY spectrum of glycyuralin R (**2**) in DMSO- $d_6$  (400 MHz).

**Fig. S17** IR spectrum of glycyuralin R (**2**).

**Fig. S18** UV spectrum of glycyuralin R (**2**).

**Fig. S19** HR-ESI-MS spectrum of glycyuralin R (**2**).

**Fig. S20**  $^1\text{H}$  NMR spectrum of glycyuralin S (**3**) in  $\text{DMSO-}d_6$  (400 MHz).

**Fig. S21**  $^{13}\text{C}$  NMR spectrum of glycyuralin S (**3**) in  $\text{DMSO-}d_6$  (100 MHz).

**Fig. S22** HMBC spectrum of glycyuralin S (**3**) in  $\text{DMSO-}d_6$  (400 MHz).

**Fig. S23** HSQC spectrum of glycyuralin S (**3**) in  $\text{DMSO-}d_6$  (400 MHz).

**Fig. S24** NOESY spectrum of glycyuralin Q (**3**) in  $\text{DMSO-}d_6$  (400 MHz).

**Fig. S25** IR spectrum of glycyuralin Q (**3**).

**Fig. S26** UV spectrum of glycyuralin Q (**3**).

**Fig. S27** HR-ESI-MS spectrum of glycyuralin S (**3**).

**Table S1** Extracted heats and weighting factors of the optimized conformers for compound **2**.

| Conformer | Extracted heats | Boltzmann-calculated contribution (%) |
|-----------|-----------------|---------------------------------------|
| 2-1       | -1375.6136983   | 2.36                                  |
| 2-2       | -1375.6114524   | 0.22                                  |
| 2-3       | -1375.6126285   | 0.76                                  |
| 2-4       | -1375.6120171   | 0.40                                  |
| 2-5       | -1375.612773    | 0.88                                  |
| 2-6       | -1375.614953    | 8.92                                  |
| 2-7       | -1375.6050163   | 0.00                                  |
| 2-8       | -1375.6170954   | 86.46                                 |

**Table S2** The sequences of the oligonucleotide primers used in this experiment.

|               | Forward primer          | Reverse primer          |
|---------------|-------------------------|-------------------------|
| iNOS          | ATCCCG AAACGATACTT      | TCTGGCGAAGAACAATCC      |
| COX-2         | TCTACAAGACGCCACATCCC    | ACGGGGTTGTTGATTTTCGTCT  |
| TNF- $\alpha$ | TCGTATGAAATGGCAAATCG    | GGTCCCAACAAGGAGGAG      |
| IL-6          | TTAGCCACTCCTTCTGTGACTCC | ACCCAATTTCCAATGCTCT     |
| MMP3          | GGAGGCAGCAGAGAACCTAC    | TCCAACCCGAGGAACTTCTG    |
| MMP13         | CAGTGCTGCGGTTCACTTTG    | TCATCATAACTCCACACGTGGTT |
| GAPDH         | CCGTTGAATTTGCCGTGA      | TGATGCCCTTTTGGCTCCC     |

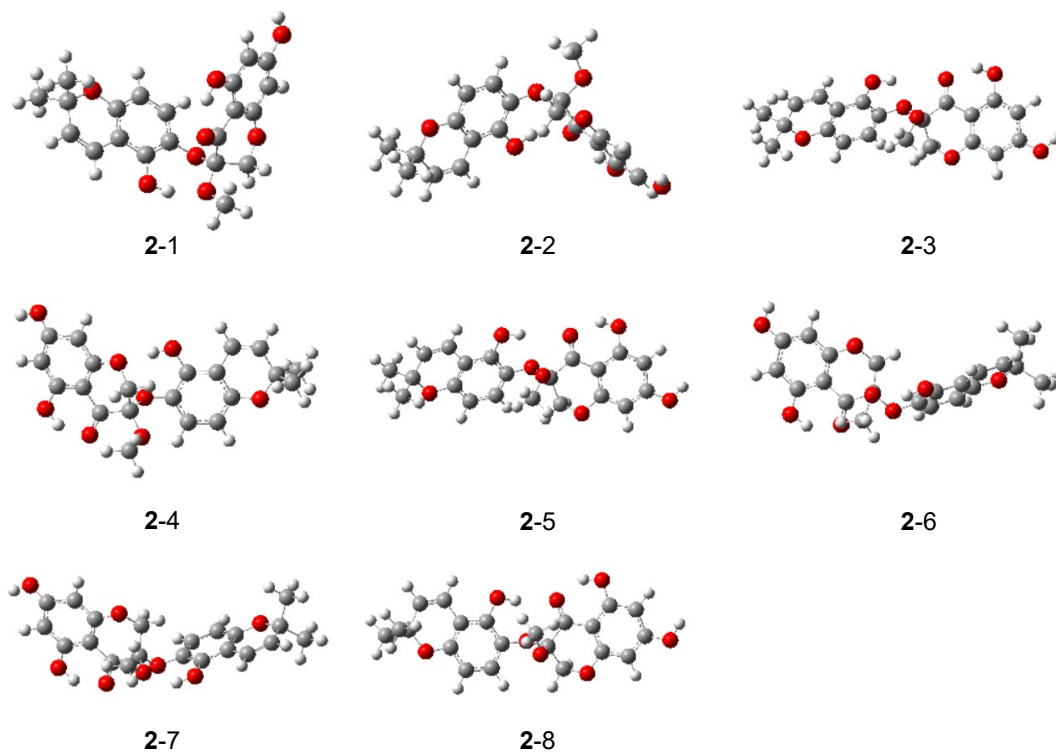

**Fig. S1** Optimized geometries of predominant conformers for compound 2.

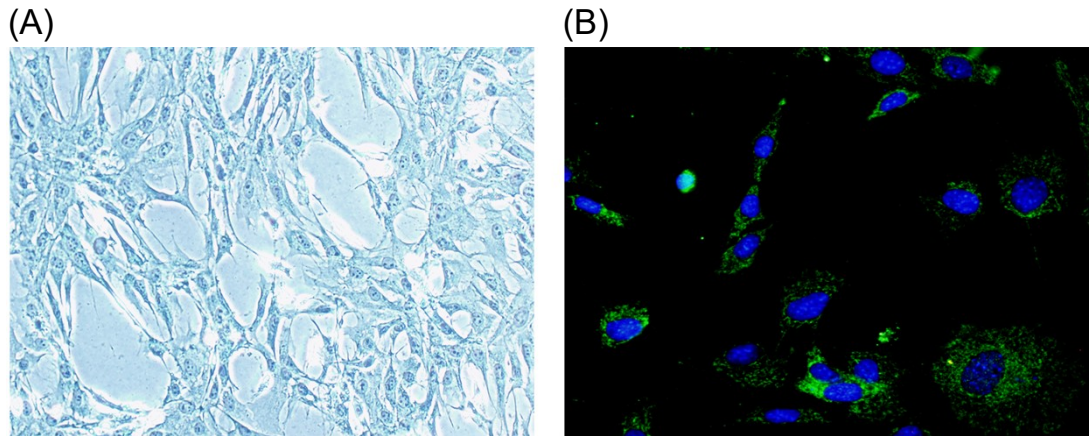

**Fig. S2** Identification of mouse primary chondrocytes by Alcian blue staining (A) and type II collagen immunohistochemistry (B).

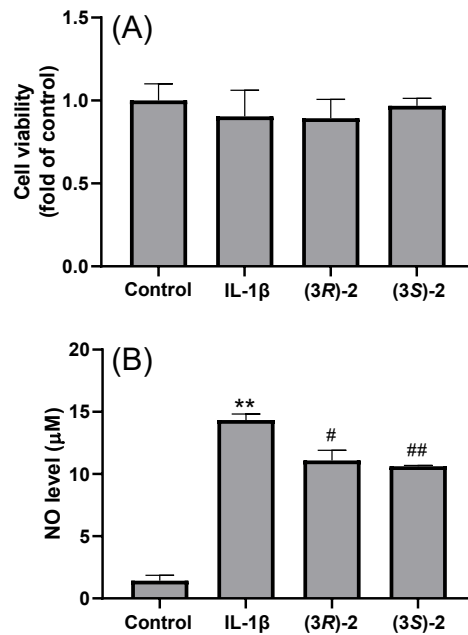

**Fig. S3** (A) Cytotoxic effect of (3R)-2 and (3S)-2 at 10  $\mu$ M: Primary mouse chondrocytes were treated with (3R)-2 or (3S)-2 for 36 h, and cell viability was evaluated using the MTT reagent. (B) NO inhibition effect of (3R)-2 and (3S)-2 at 10  $\mu$ M: Chondrocytes were treated with (3R)-2 or (3S)-2 for 36 h after IL-1 $\beta$  stimulation, and NO level in culture media was determined using Griess assay. \*\*  $p < 0.01$ , vs. control group; #  $p < 0.05$  and ##  $p < 0.01$ , vs. IL-1 $\beta$  alone.

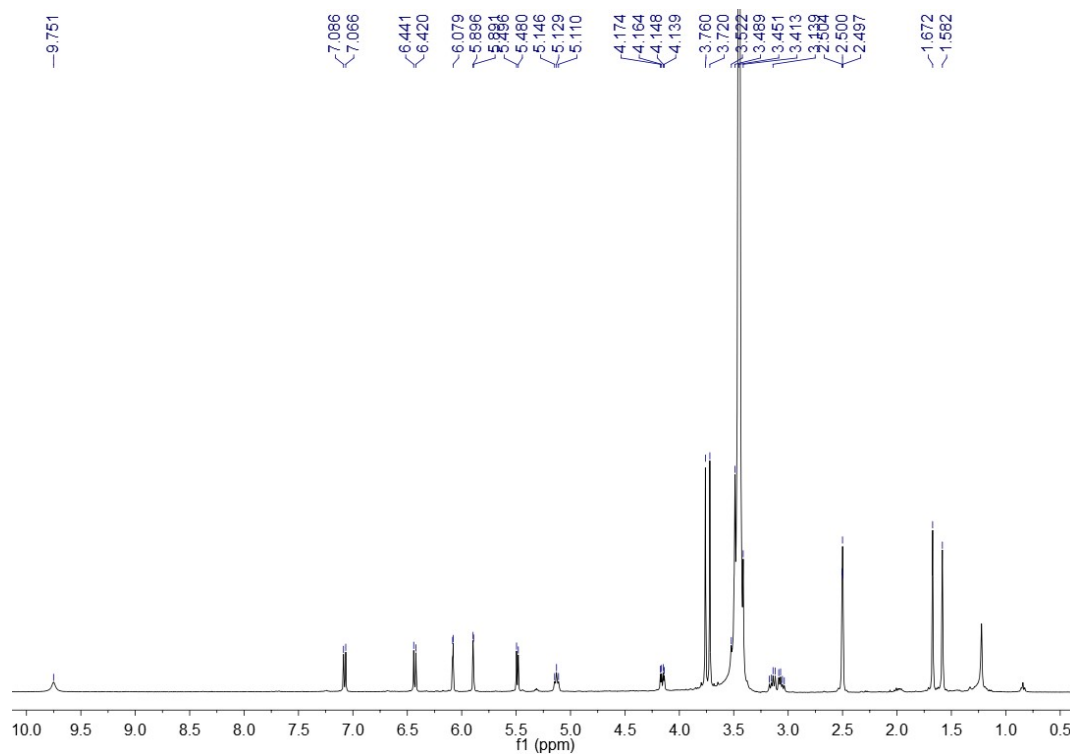

Fig. S4  $^1\text{H}$  NMR spectrum of glycyralin Q (**1**) in  $\text{DMSO-}d_6$  (400 MHz).

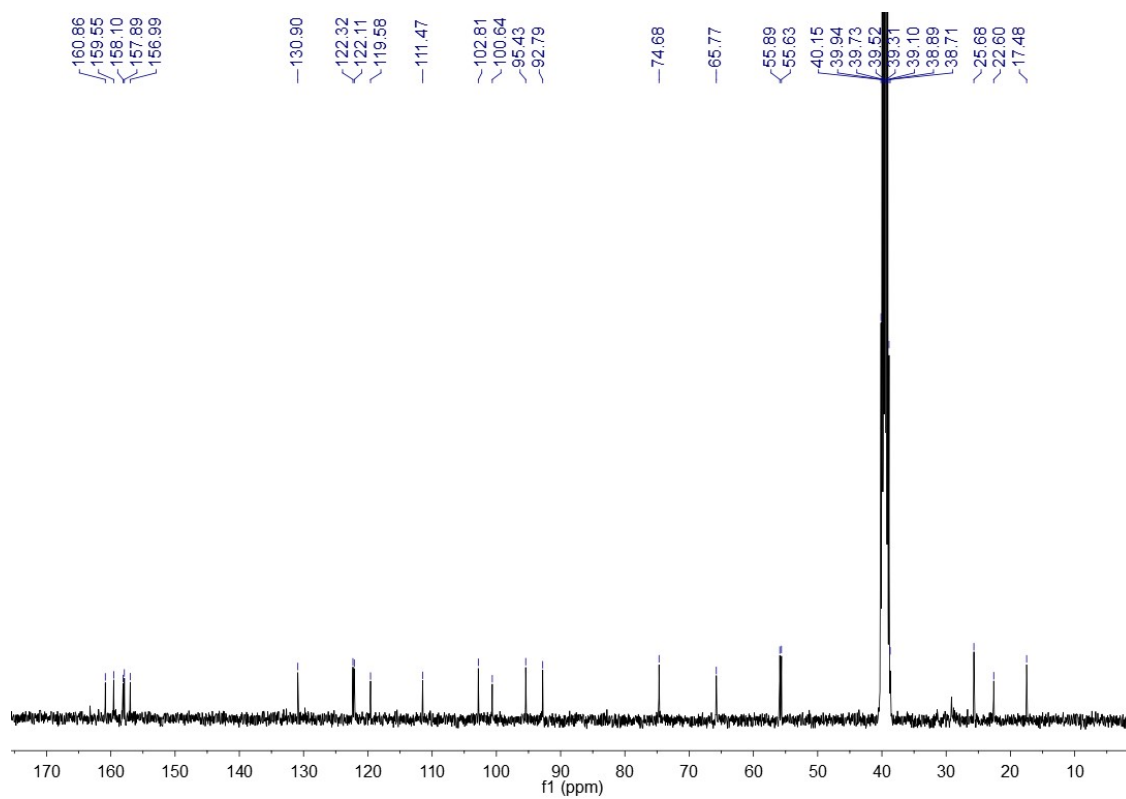

Fig. S5  $^{13}\text{C}$  NMR spectrum of glycyralin Q (**1**) in  $\text{DMSO-}d_6$  (100 MHz).

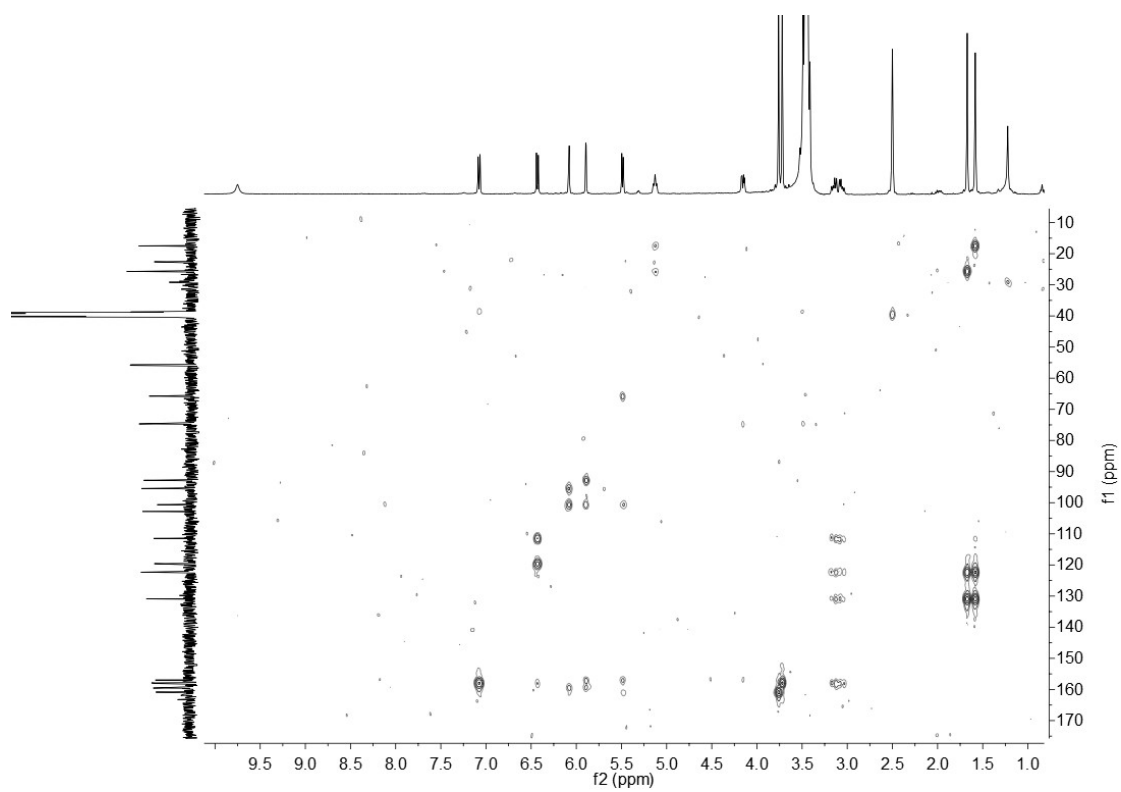

**Fig. S6** HMBC spectrum of glycyuralin Q (**1**) in DMSO-*d*<sub>6</sub> (400 MHz).

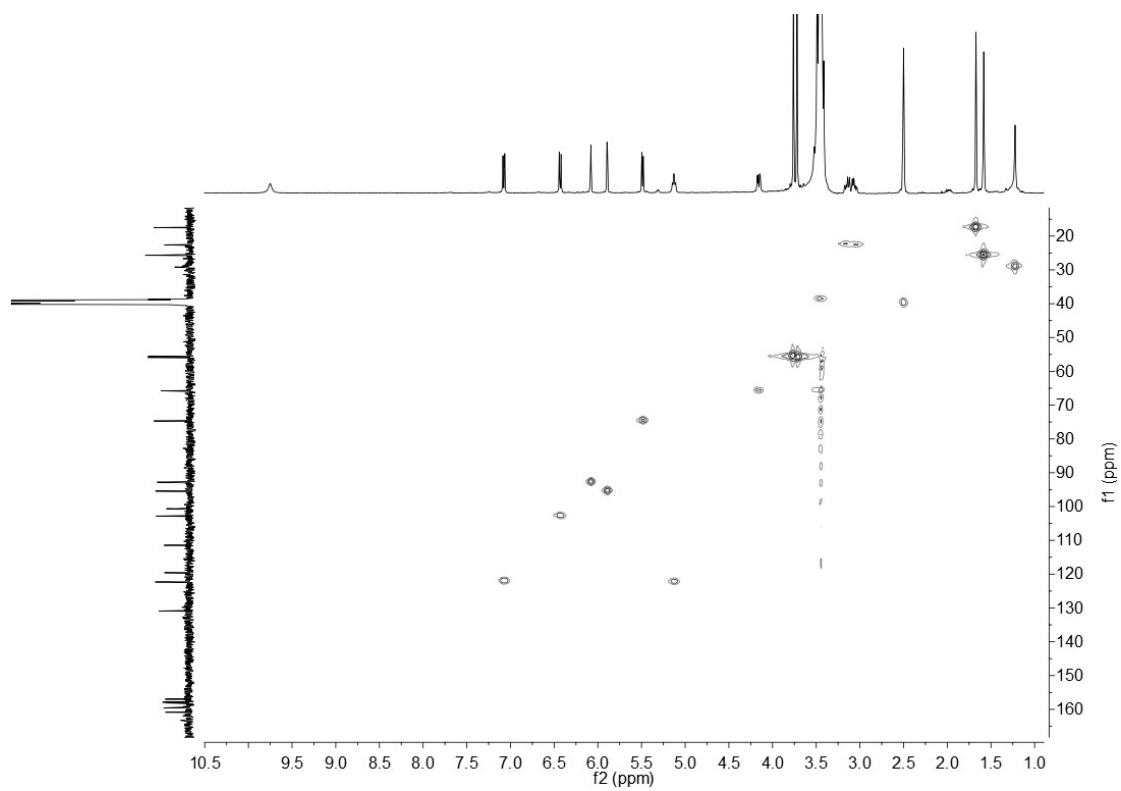

**Fig. S7** HSQC spectrum of glycyuralin Q (**1**) in DMSO-*d*<sub>6</sub> (400 MHz).



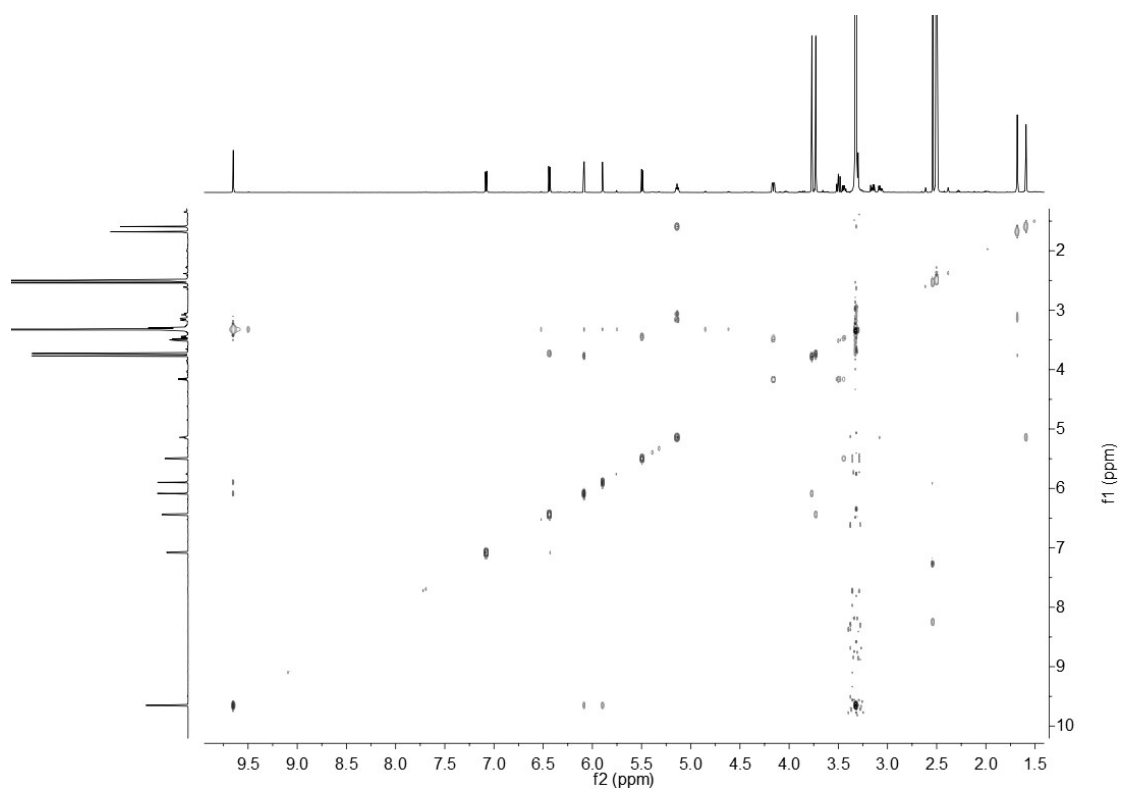

**Fig. S8** NOESY spectrum of glycyuralin Q (**1**) in DMSO- $d_6$  (400 MHz).

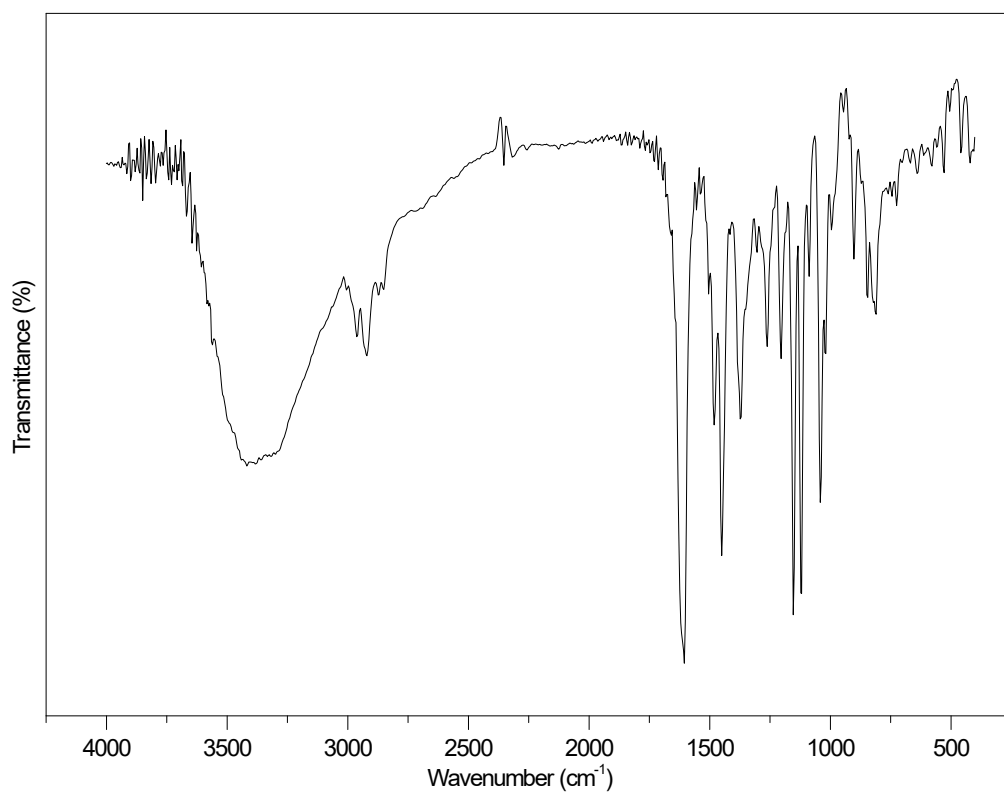

**Fig S9** IR spectrum of glycyuralin Q (**1**).

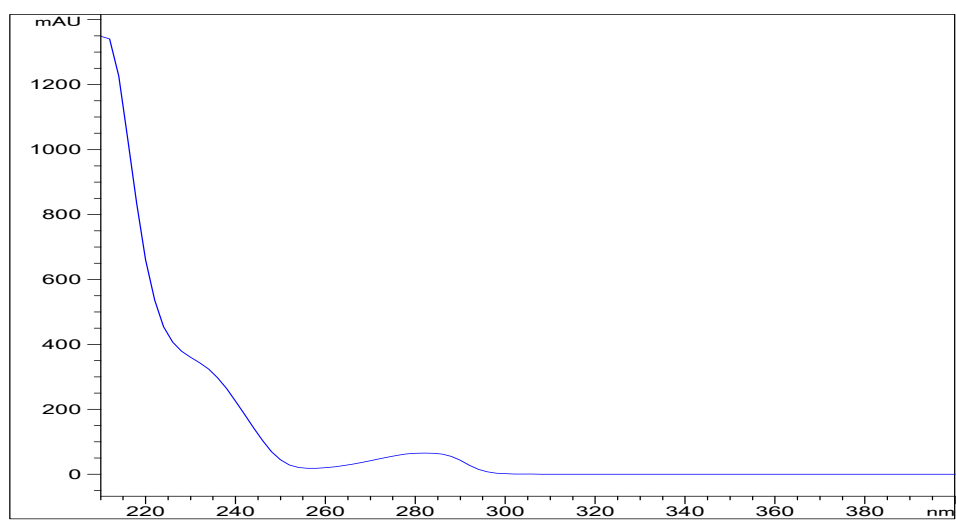

**Fig. S10** UV spectrum of glycyuralin Q (1).

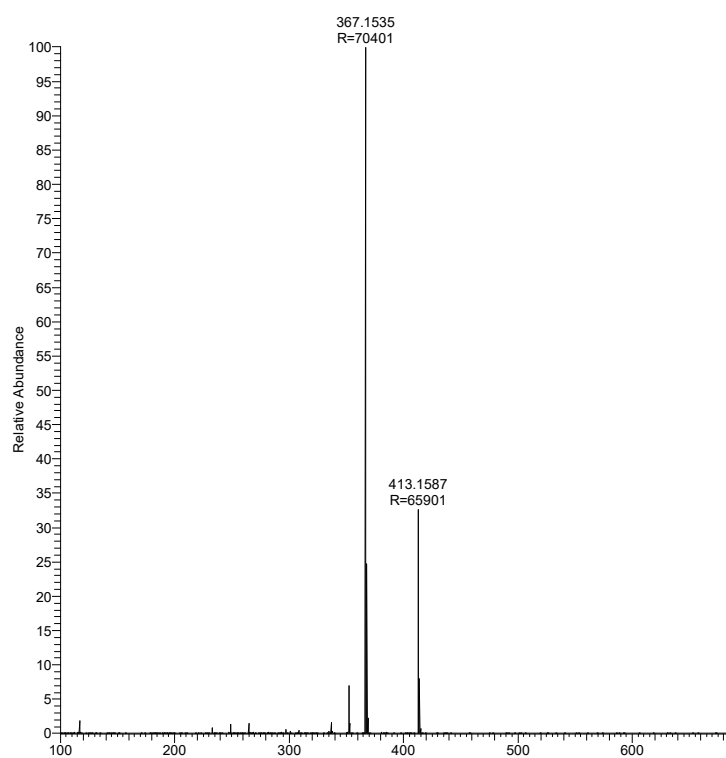

**Fig. S11** HR-ESI-MS spectrum of glycyuralin Q (1).

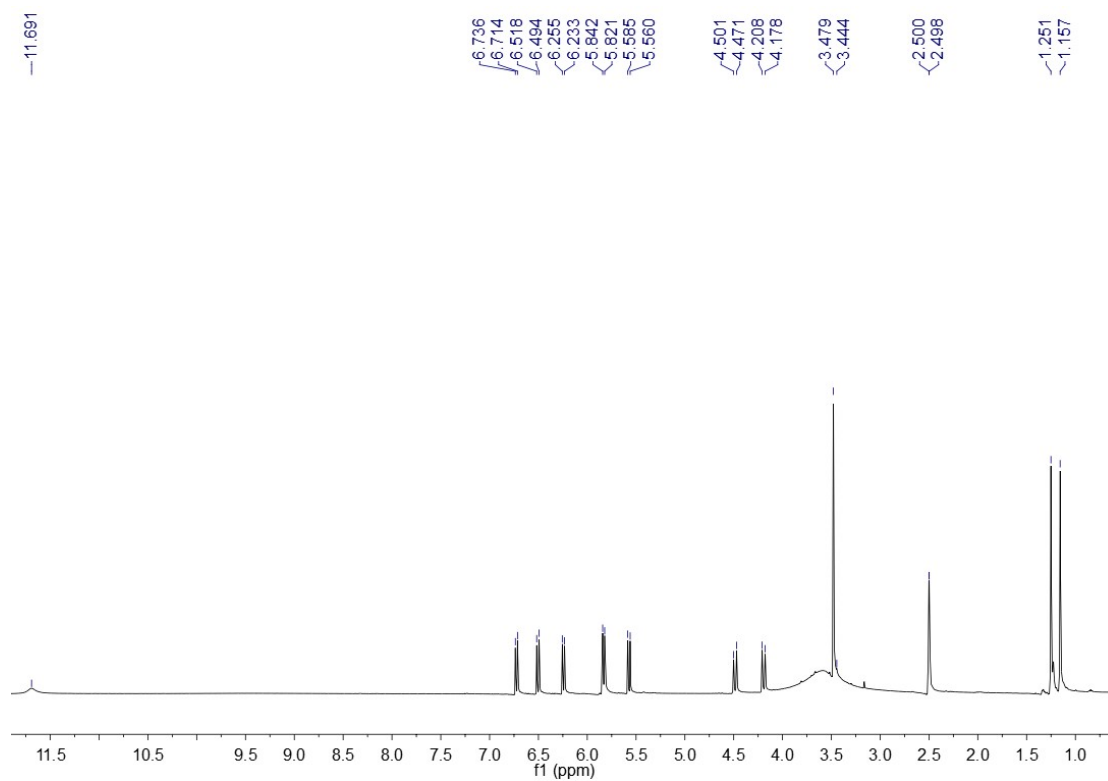

**Fig. S12**  $^1\text{H}$  NMR spectrum of glycyuralin R (**2**) in  $\text{DMSO-}d_6$  (400 MHz).

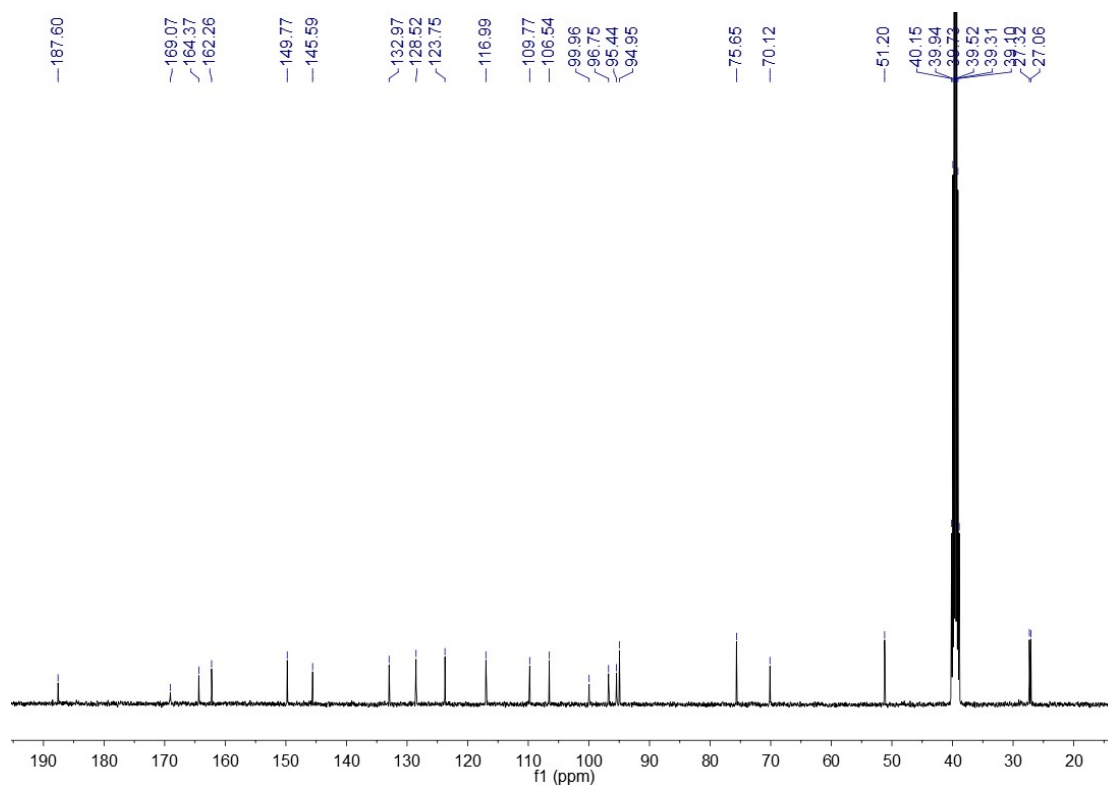

**Fig. S13**  $^{13}\text{C}$  NMR spectrum of glycyuralin R (**2**) in  $\text{DMSO-}d_6$  (100 MHz).

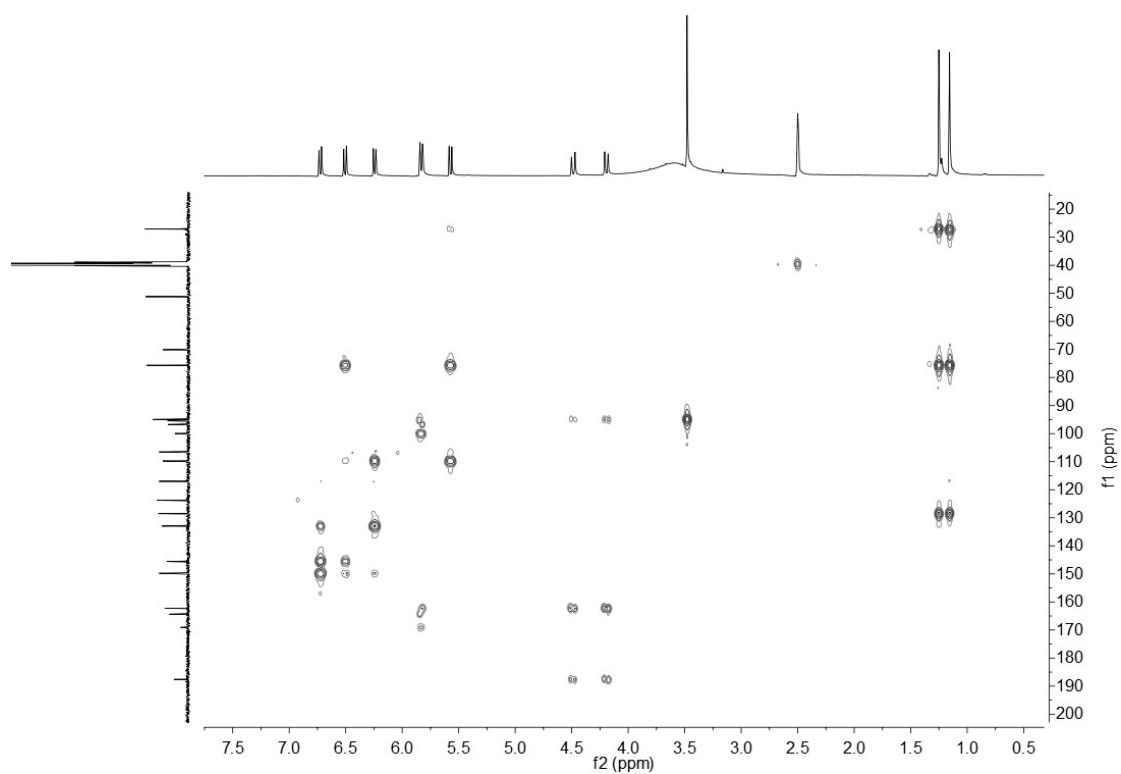

**Fig. S14** HMBC spectrum of glycyralin R (**2**) in DMSO-*d*<sub>6</sub> (400 MHz).

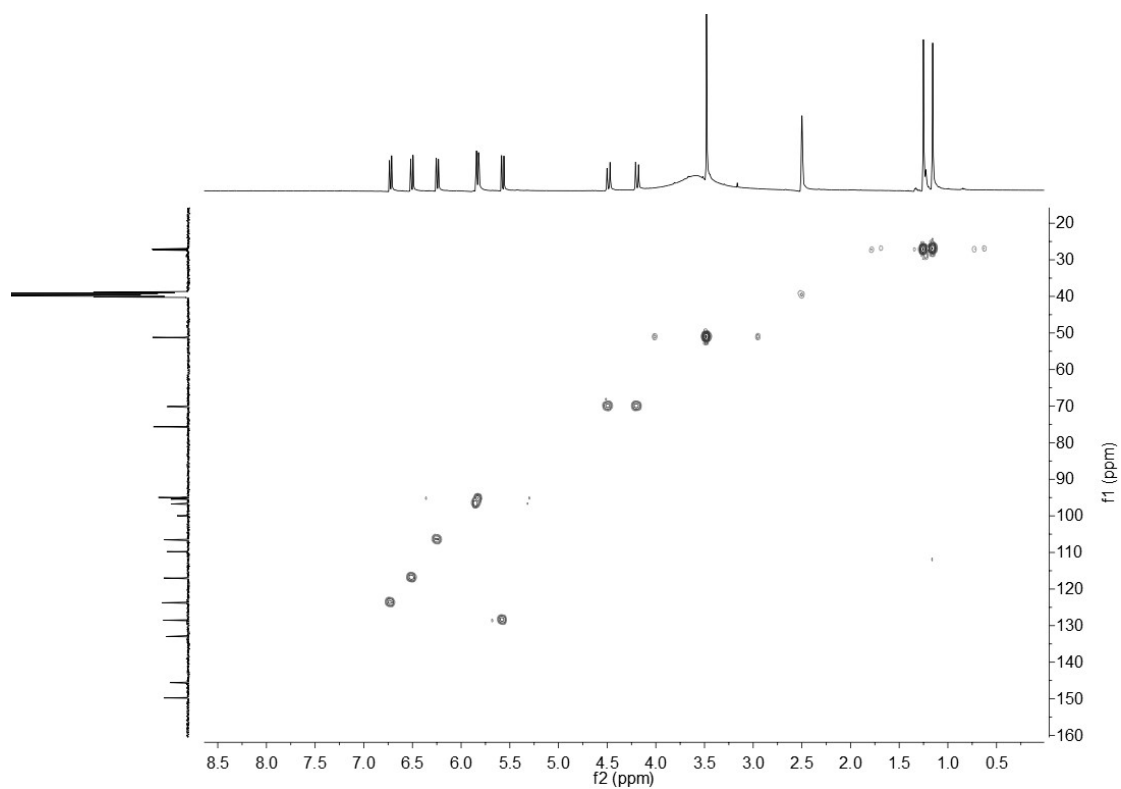

**Fig. S15** HSQC spectrum of glycyralin R (**2**) in DMSO-*d*<sub>6</sub> (400 MHz).

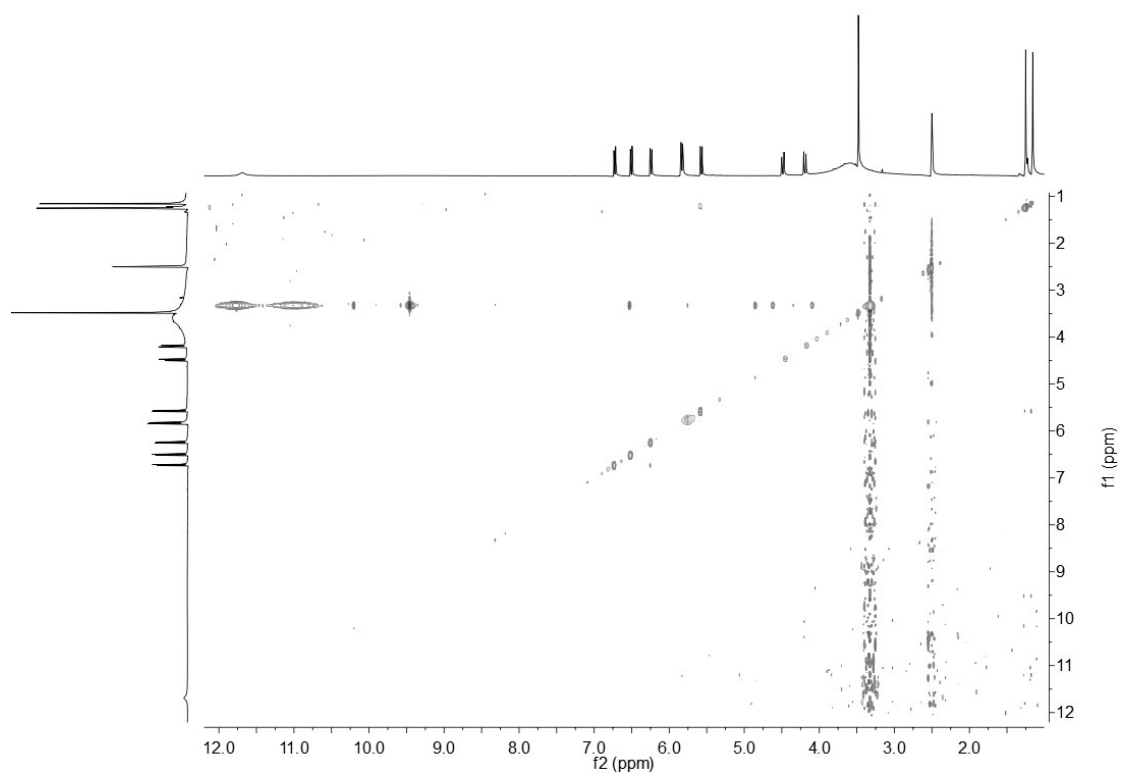

**Fig. S16** NOESY spectrum of glycyuralin Q (**2**) in DMSO- $d_6$  (400 MHz).

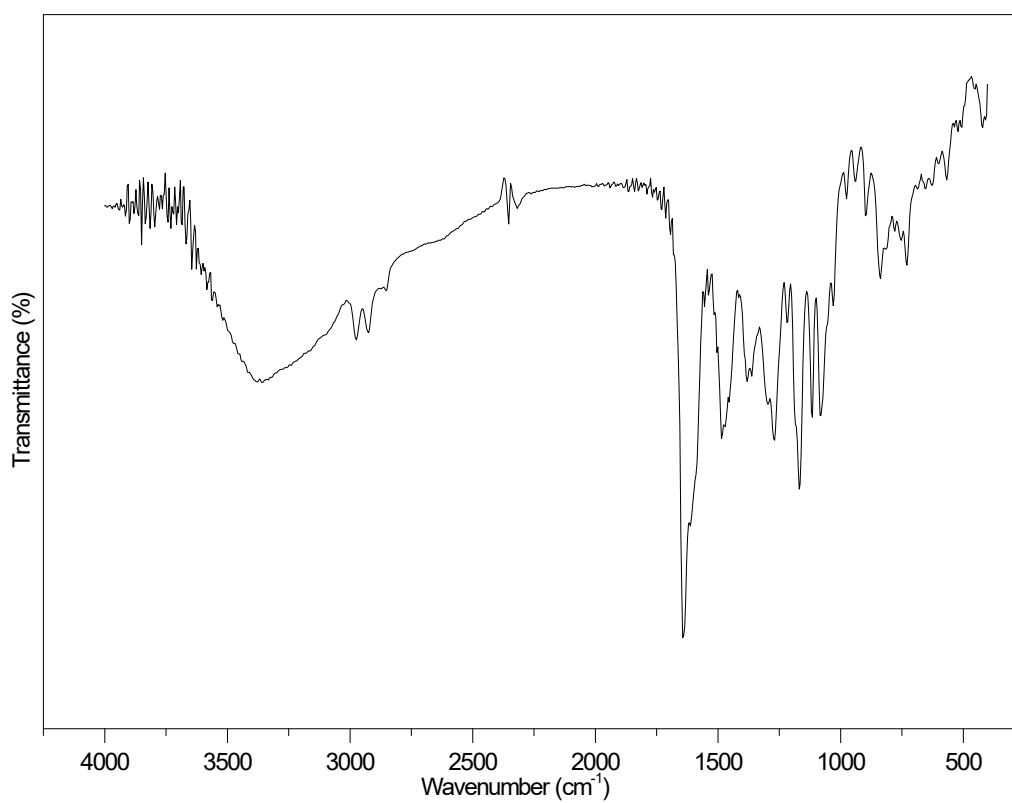

**Fig. S17** IR spectrum of glycyuralin Q (**2**).

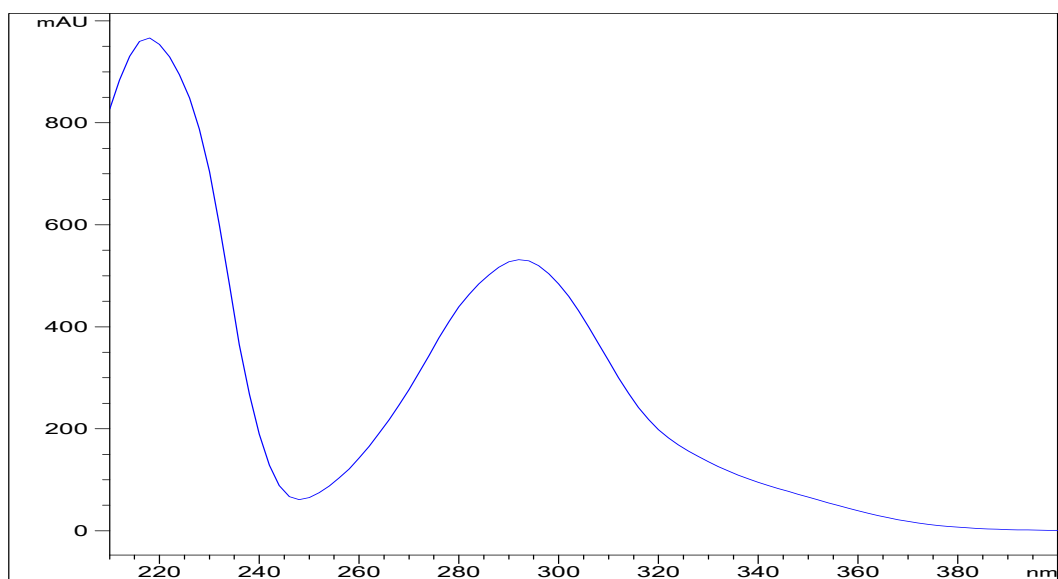

**Fig. S18** UV spectrum of glycyuralin Q (2).

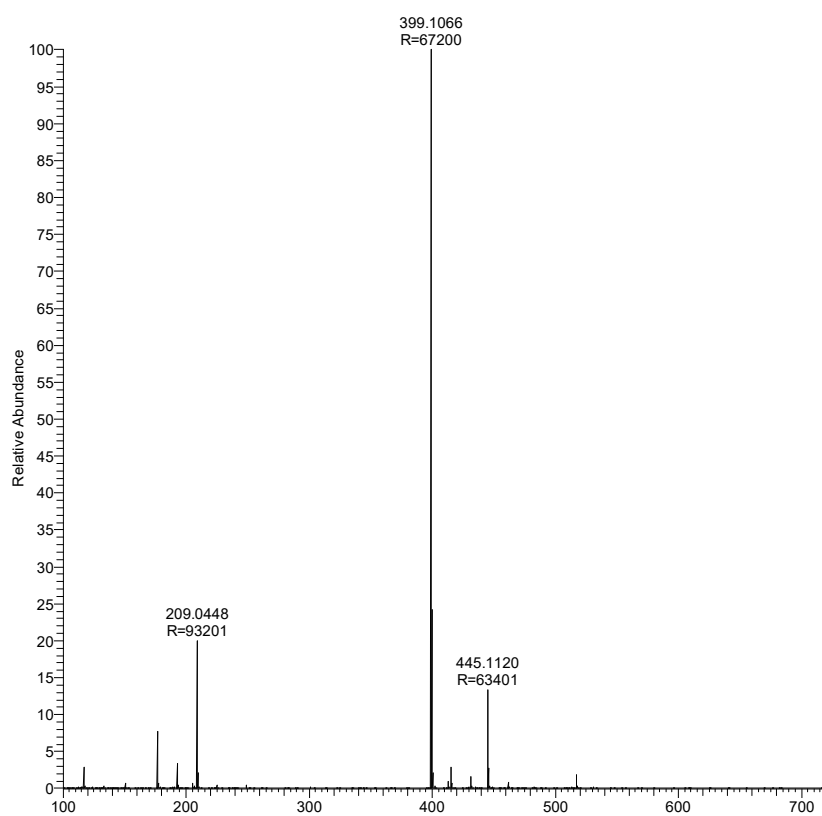

**Fig. S19** HR-ESI-MS spectrum of glycyuralin R (2).

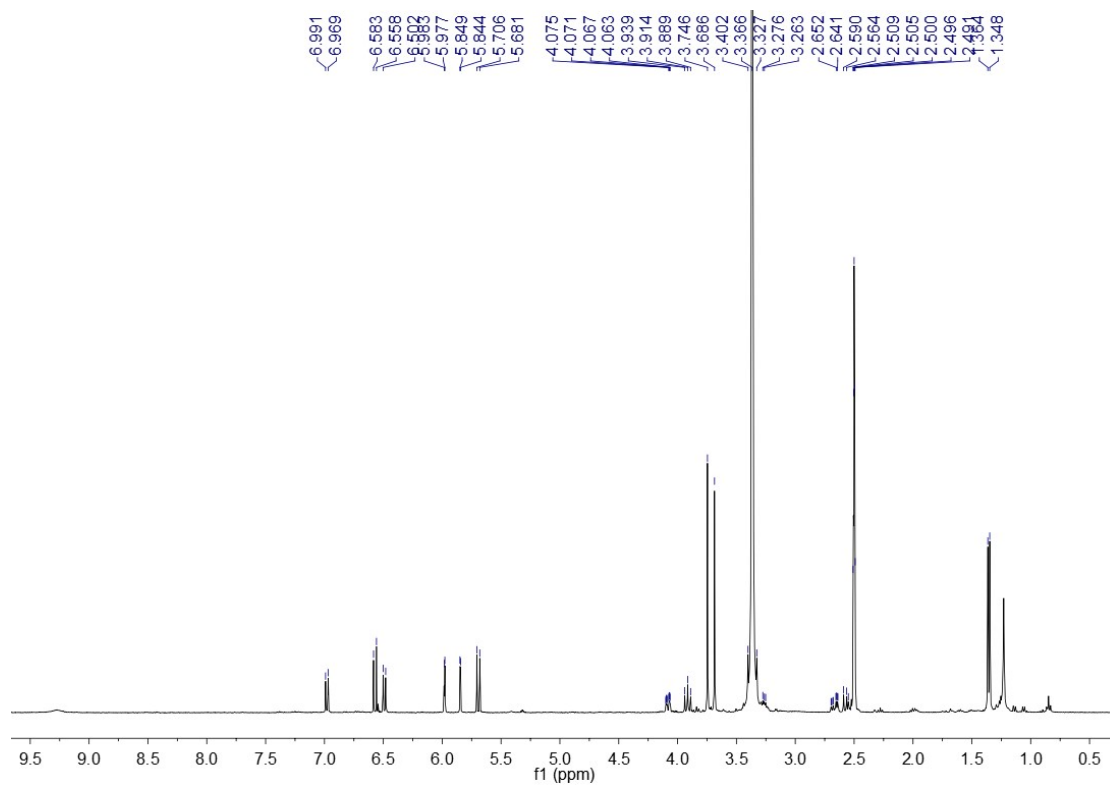

**Fig. S20**  $^1\text{H}$  NMR spectrum of glycyuralin S (**3**) in  $\text{DMSO-}d_6$  (400 MHz).

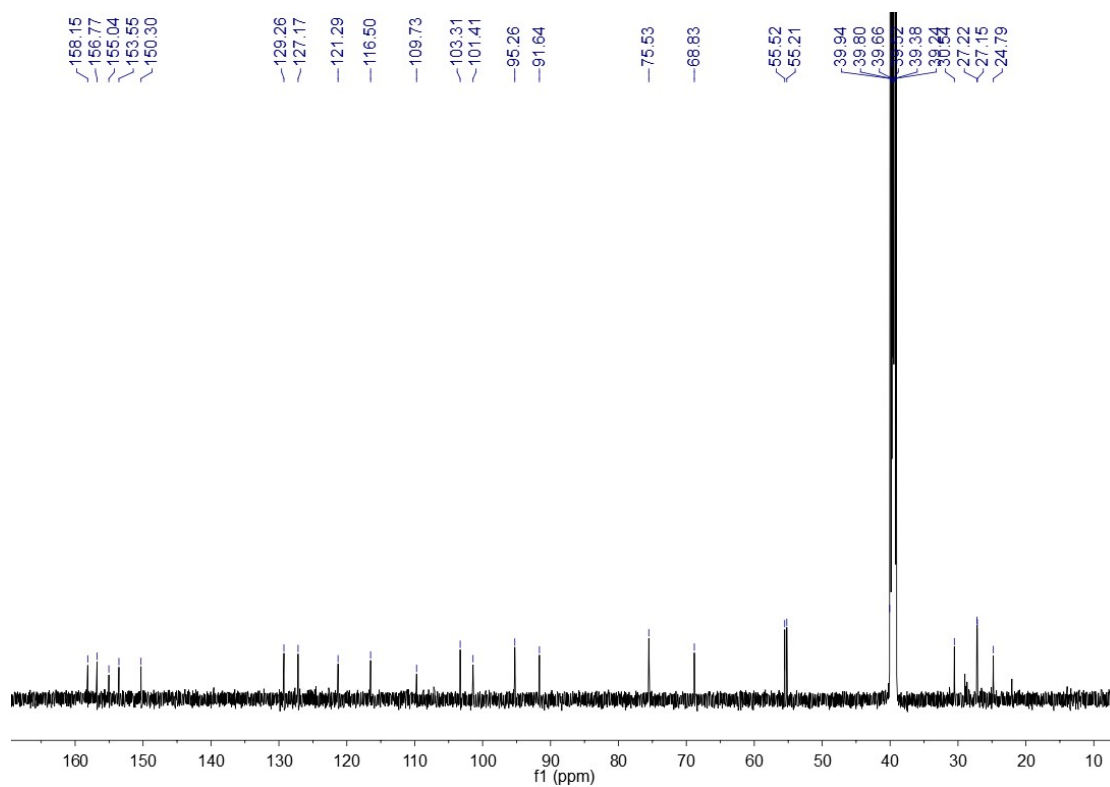

**Fig. S21**  $^{13}\text{C}$  NMR spectrum of glycyuralin S (**3**) in  $\text{DMSO-}d_6$  (100 MHz).

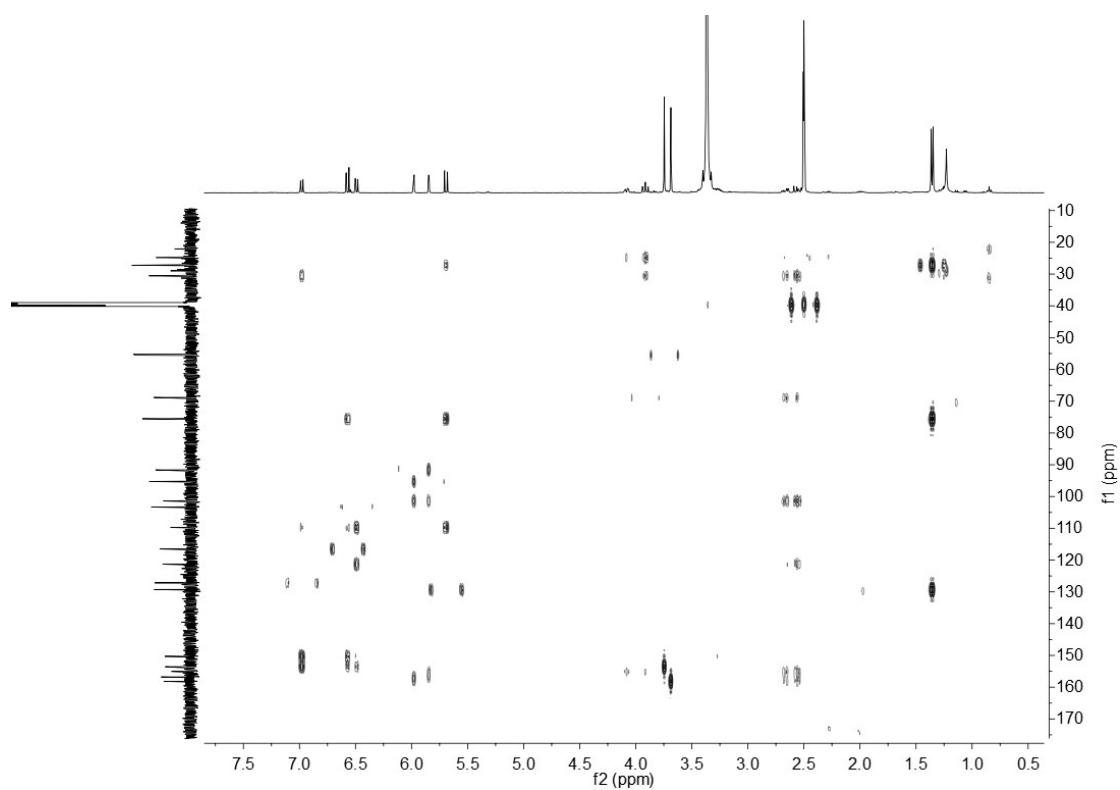

Fig. S22 HMBC spectrum of glycyuralin S (**3**) in DMSO-*d*<sub>6</sub> (400 MHz).

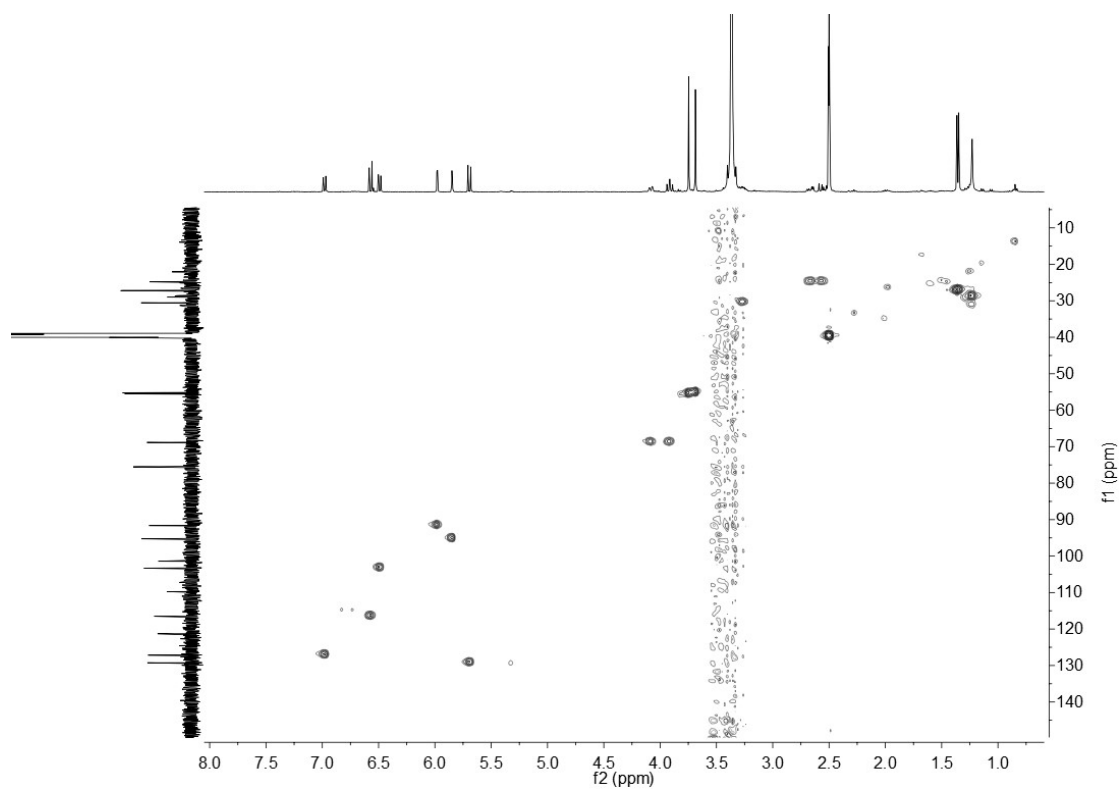

Fig. S23 HSQC spectrum of glycyuralin S (**3**) in DMSO-*d*<sub>6</sub> (400 MHz).



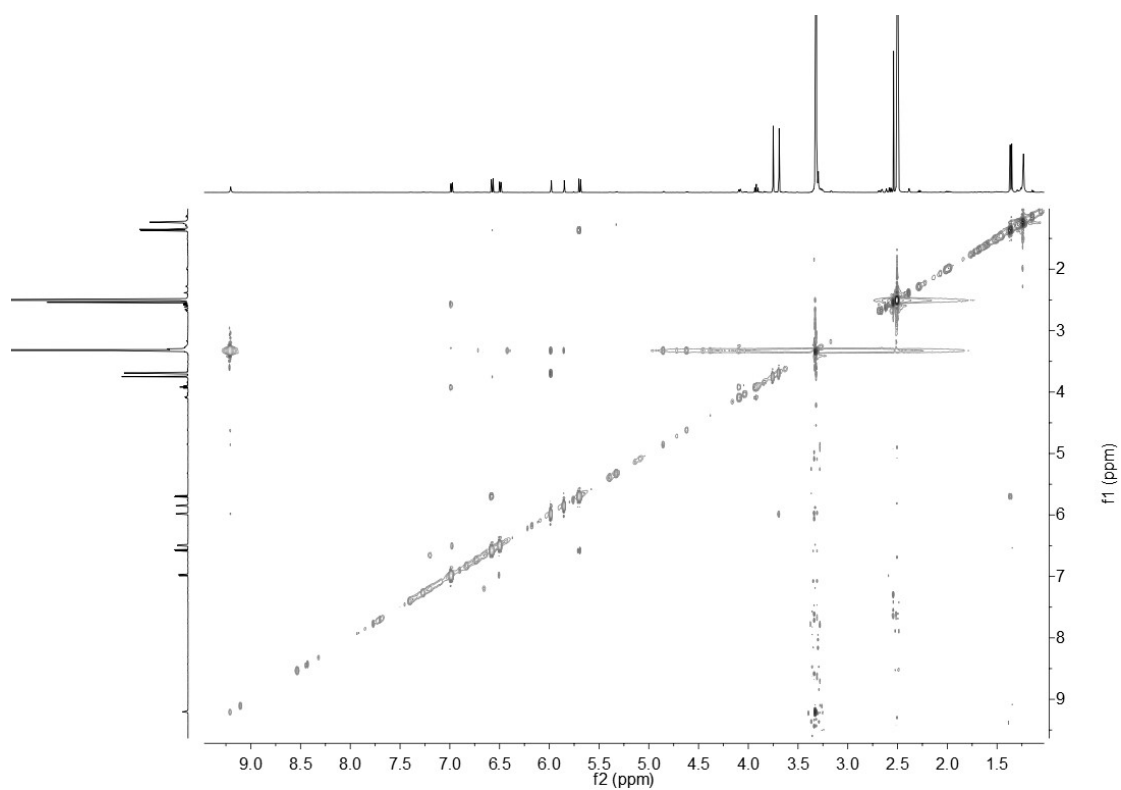

**Fig. S24** NOESY spectrum of glycyuralin Q (**3**) in DMSO- $d_6$  (400 MHz).

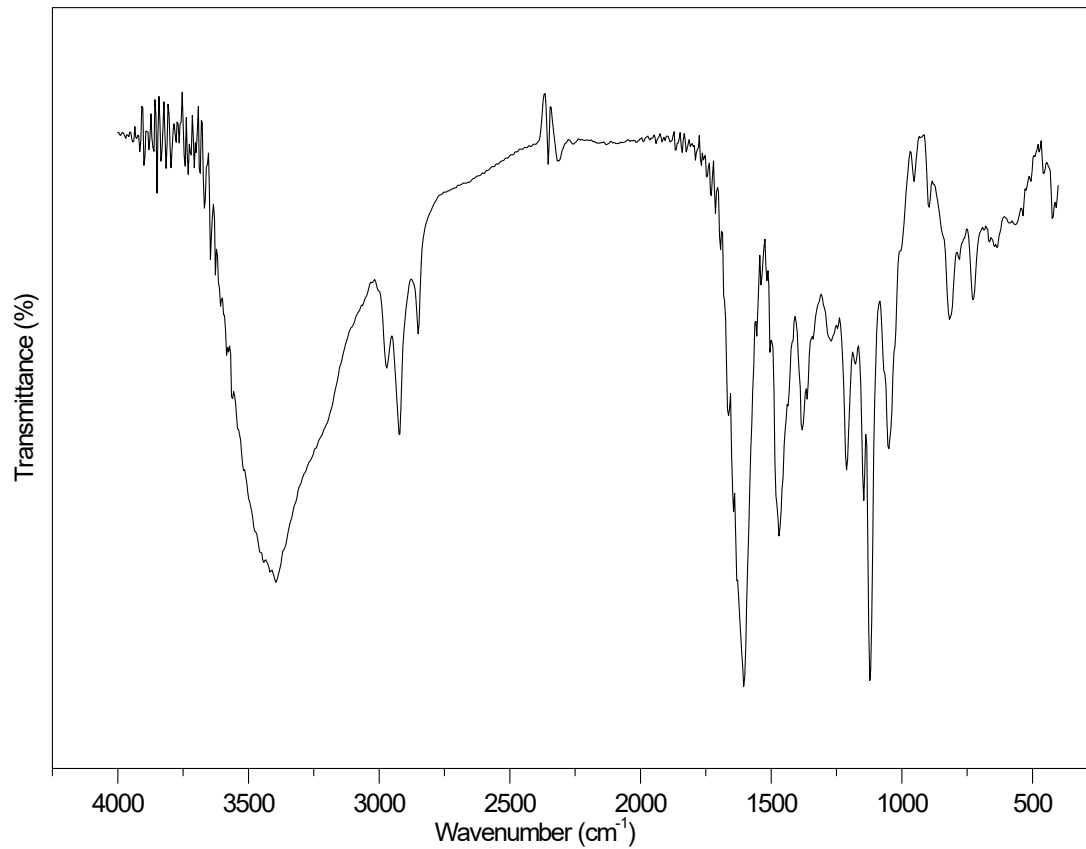

**Fig. S25** IR spectrum of glycyuralin Q (**3**).

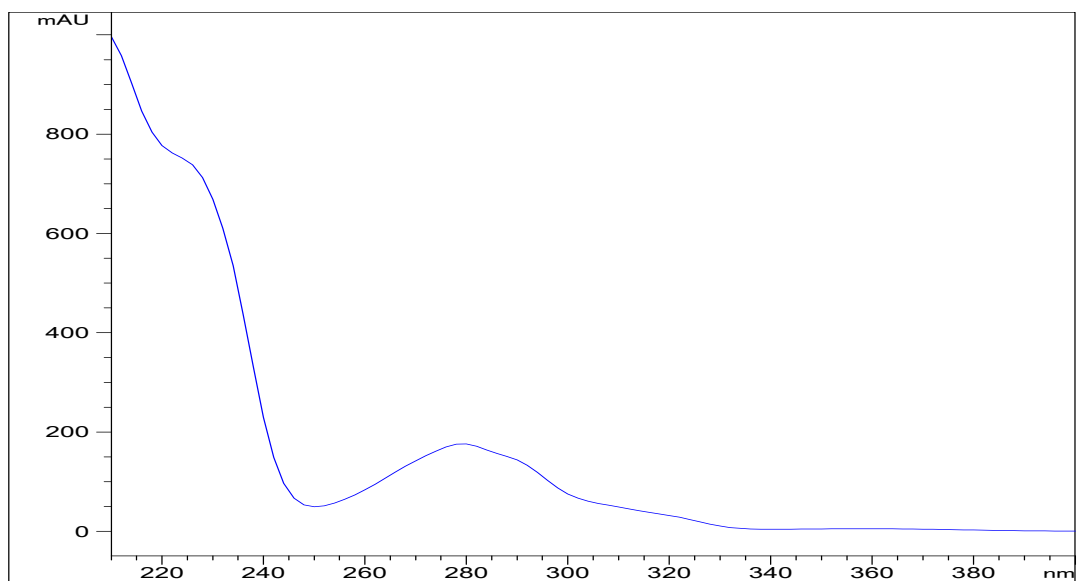

**Fig. S26** UV spectrum of glycyuralin Q (3).

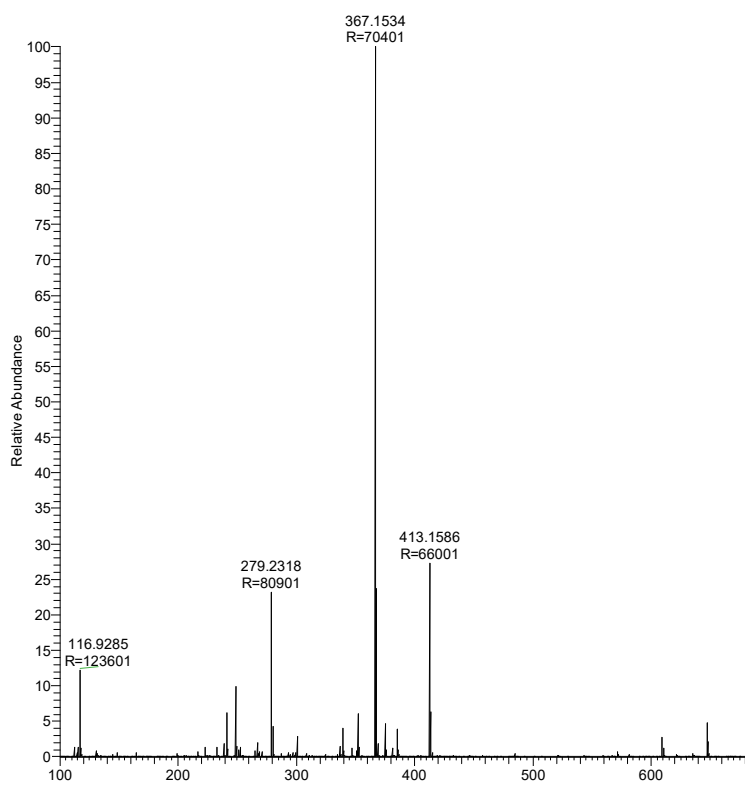

**Fig. S27** HR-ESI-MS spectrum of glycyuralin S (3).
